# Supplementary material for: The mosquito effect: regulatory and effector T cells acquire cytoplasmic material from tumor cells through intercellular transfer
Source: PubMed Central journal article supplement (PMC10765531; doi:10.3389/fimmu.2023.1272918), 2023-12-20

Supplemental figure 1

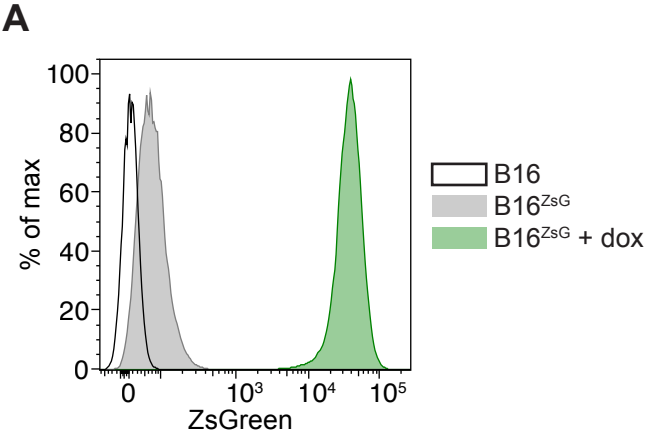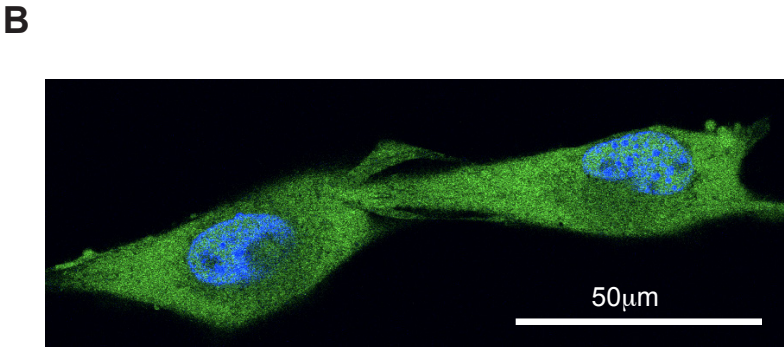

**Supplemental figure 2**

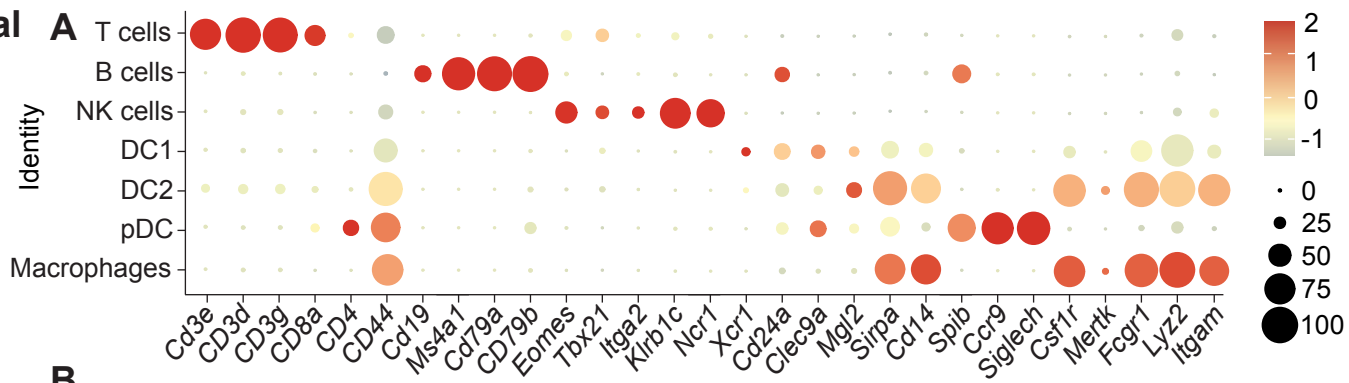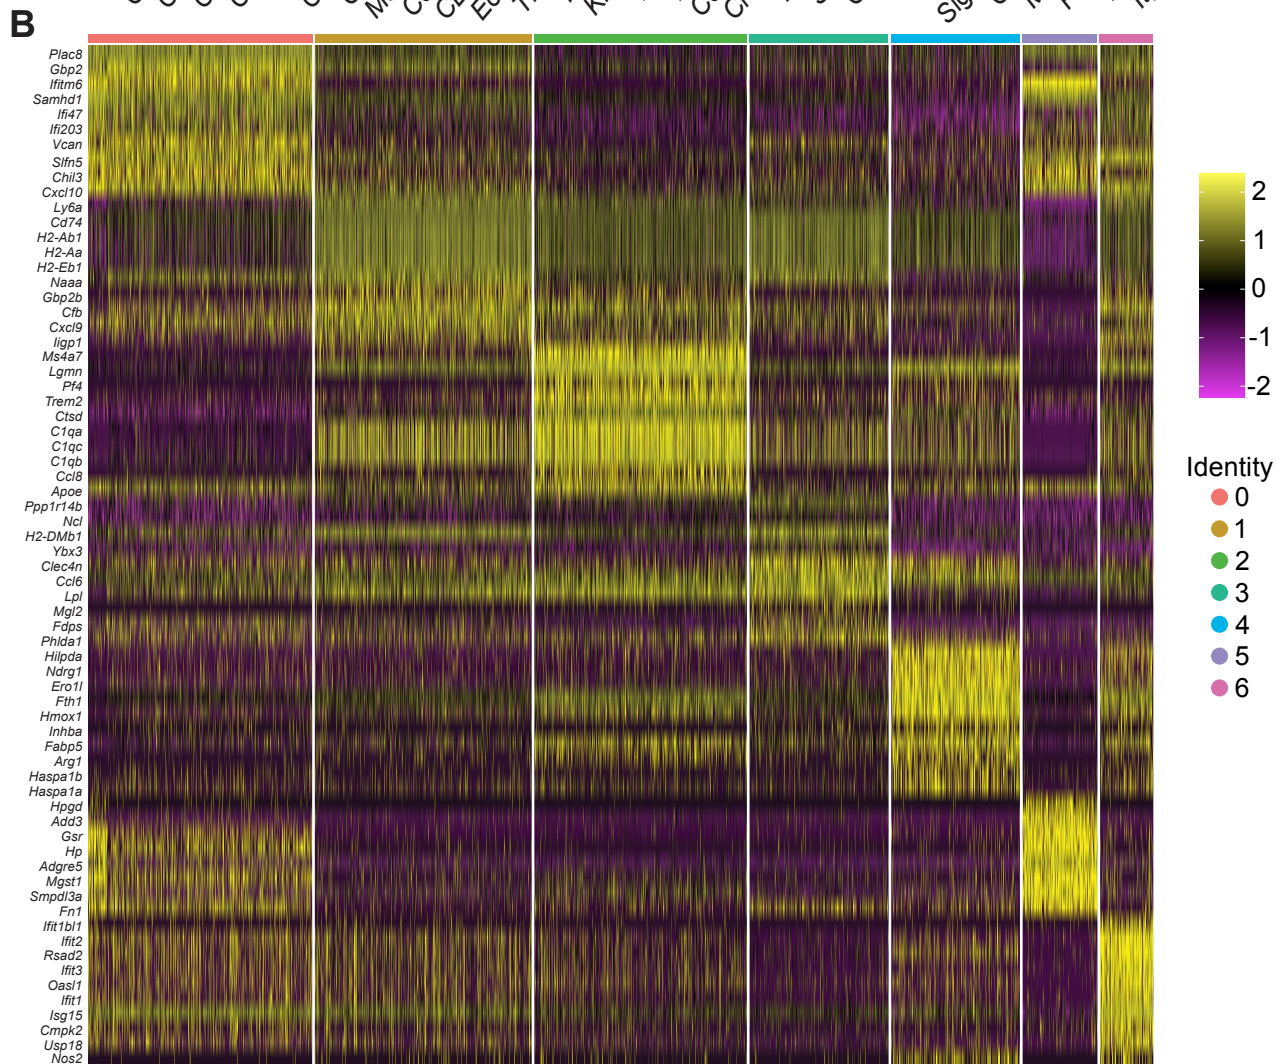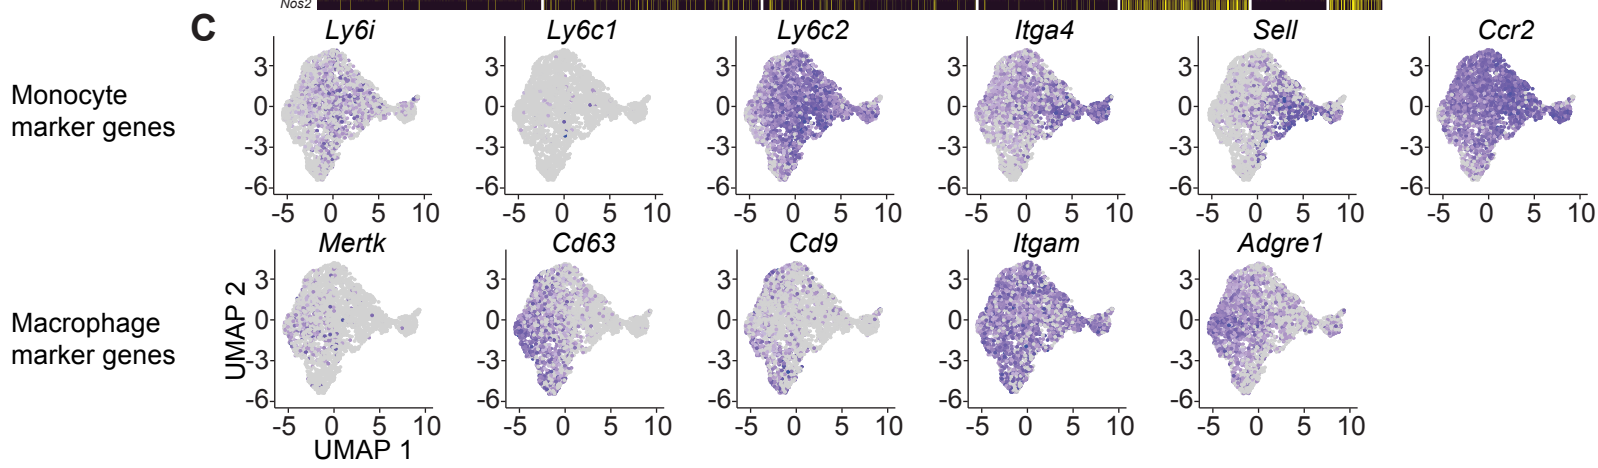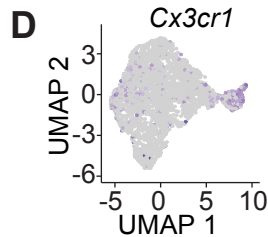

# Supplemental figure 3

## A Defining the populations

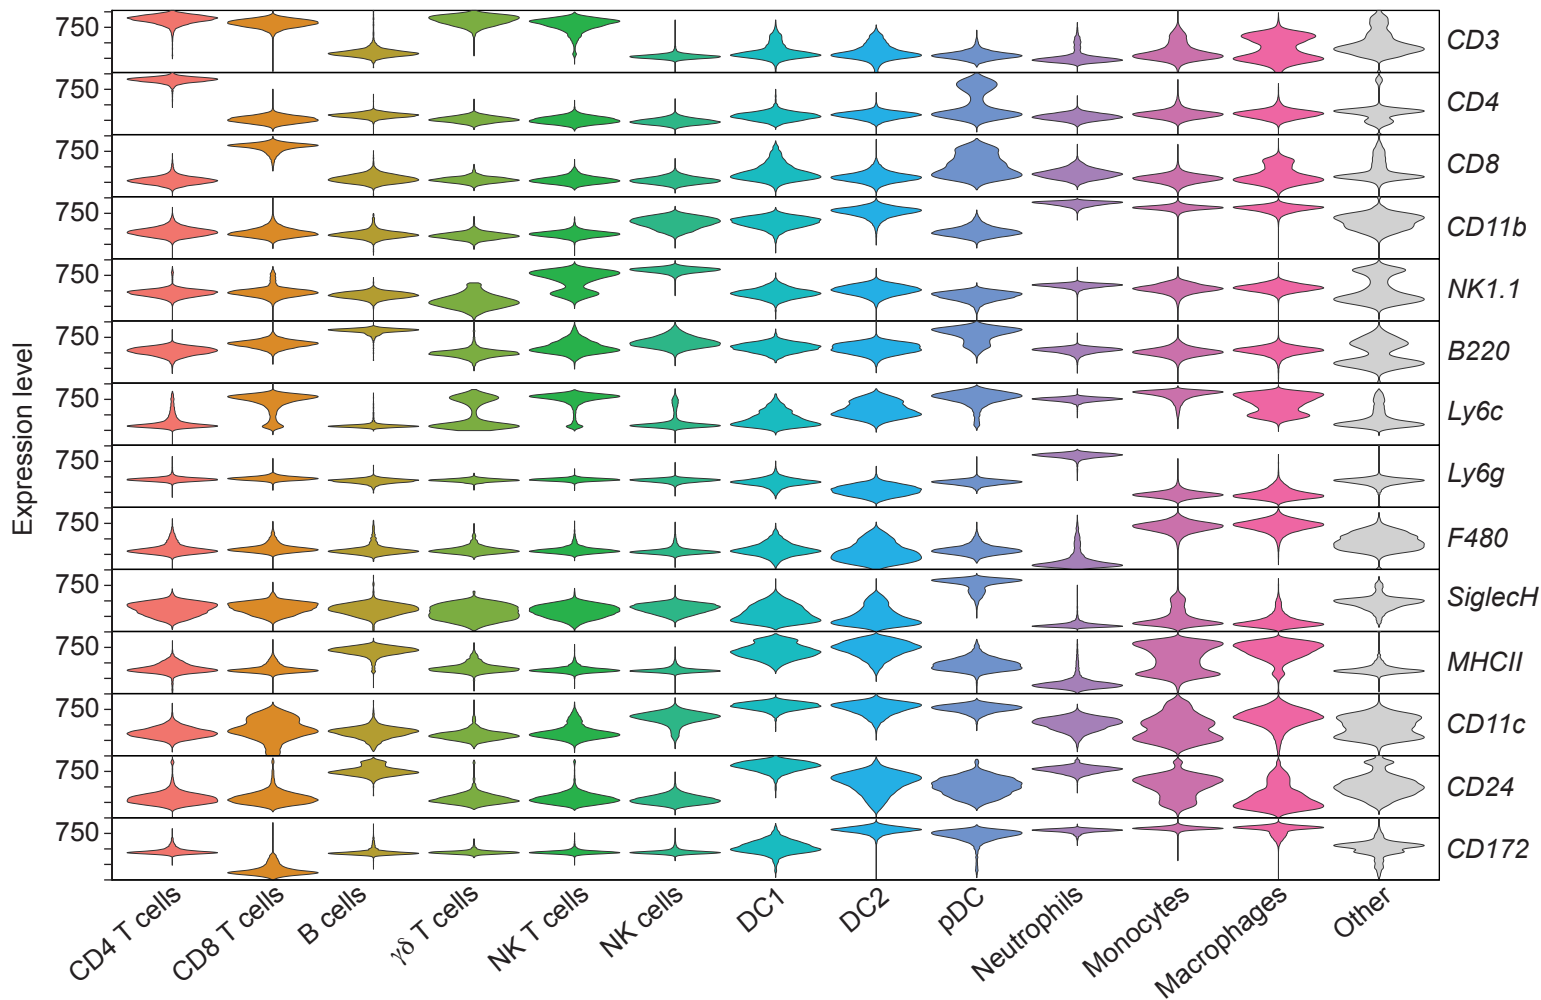

## B TILs from MC38<sup>ZsG</sup> tumors

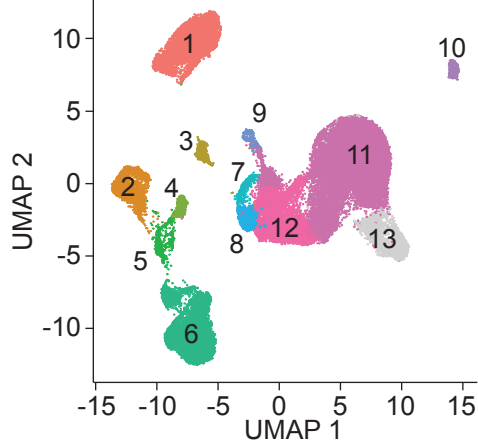

- (1) CD4 T cells
- (2) CD8 T cells
- (3) B cells
- (4)  $\gamma\delta$  T cells
- (5) NKT cells
- (6) NK cells
- (7) DC1
- (8) DC2
- (9) pDC
- (10) Neutrophils
- (11) Monocytes
- (12) Macrophages
- (13) Others

## ZsG fluorescence

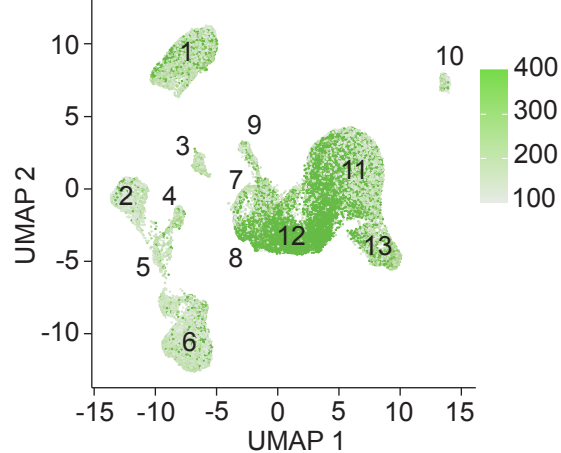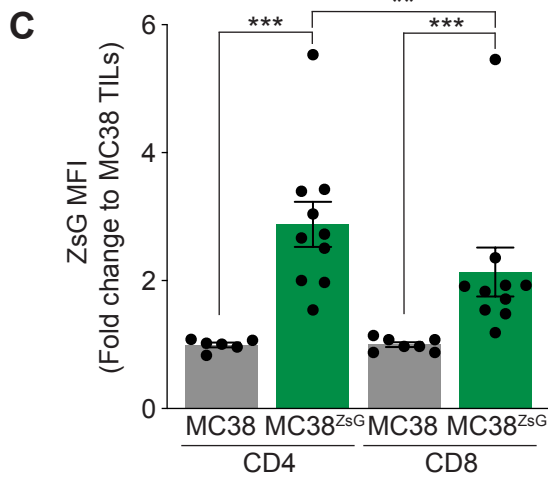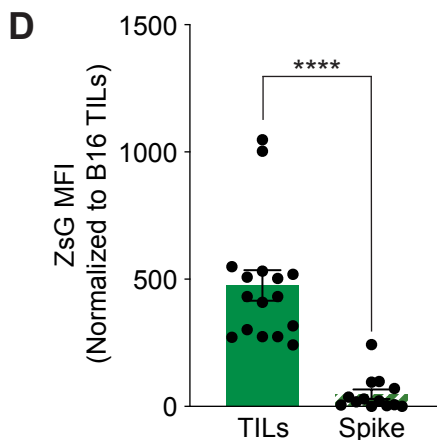



# Supplemental figure 5

**A**

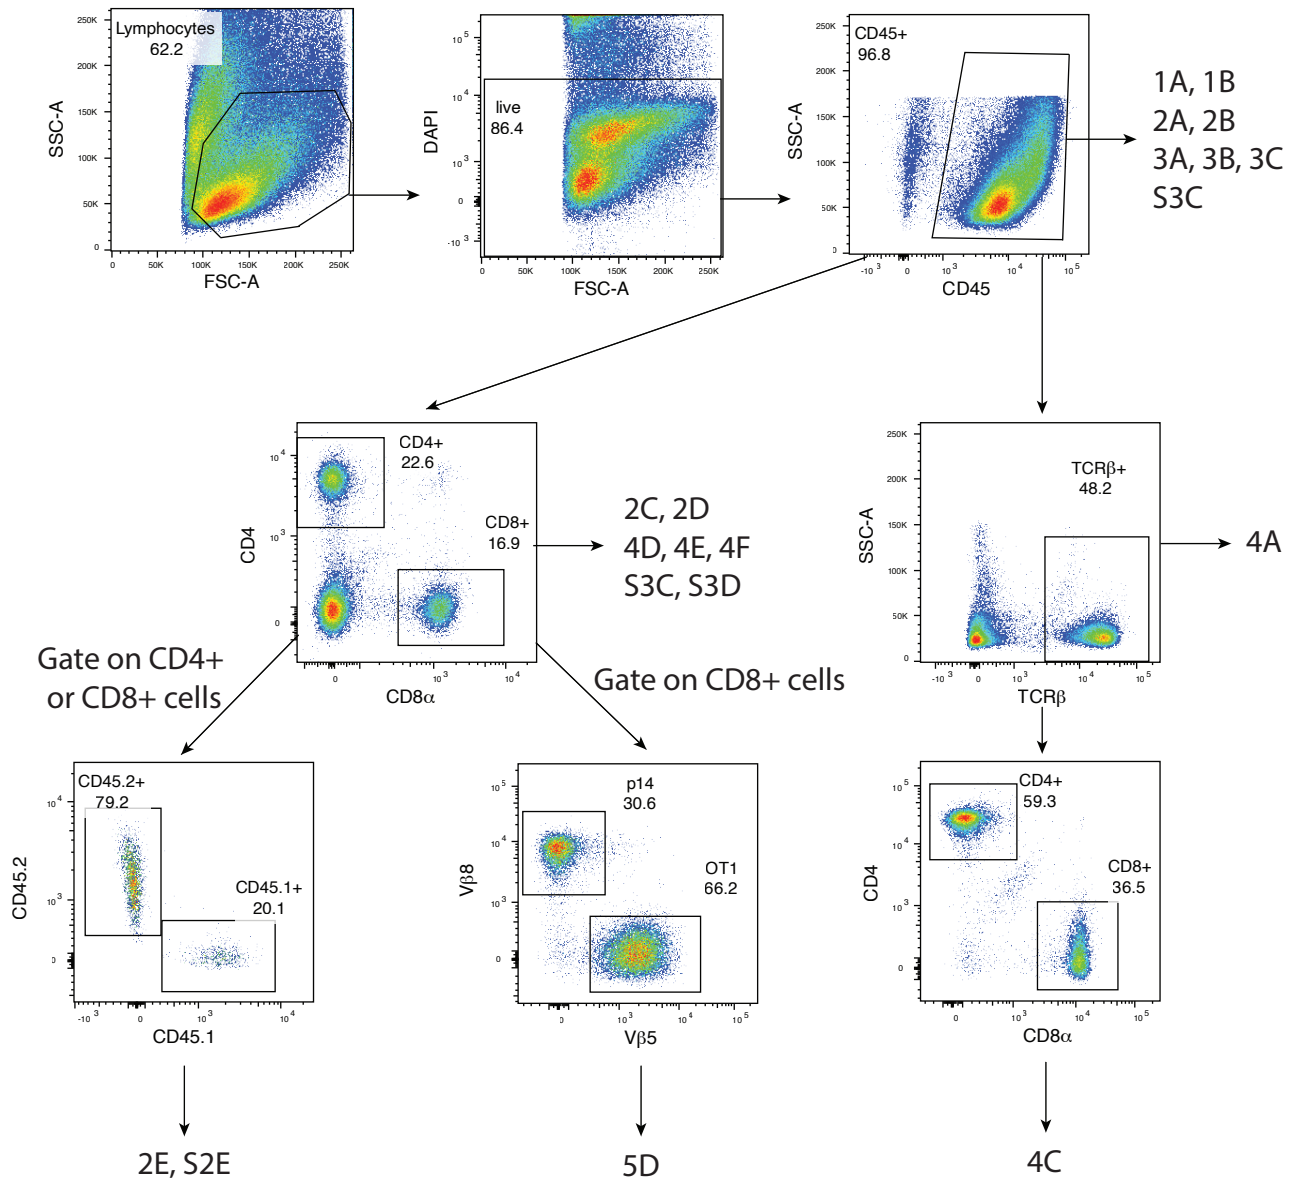

**B**

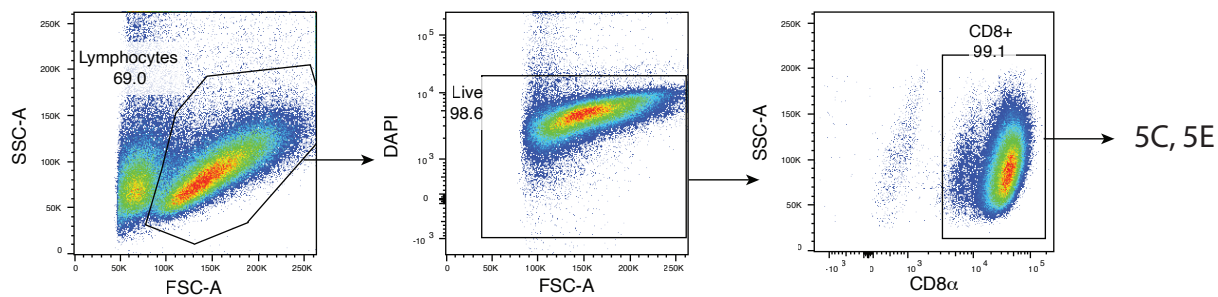

Supplement: DataSheet_1.pdf [file DataSheet_1.pdf]
